# Supplementary material for: The acceleration of sea-level rise along the coast of the Netherlands started in the 1960s
Source: Copernicus journal article supplement (doi:10.5194/egusphere-2022-935), 2022-10-04
Supplement: Supplementary file [file egusphere-2022-935-AC3-supplement.pdf]

**DOI:** 10.5194/egusphere-2022-935  
**Version:** Revision  
**Title:** The acceleration of sea-level rise along the coast of the Netherlands started in the 1960s  
**Authors:** Iris Keizer, D. Le Bars, C. de Valk, A. Jüling, R. van de Wal, and S. Drijfhout

## Point by point reply to reviewer #1

March 3, 2023

We thank the reviewer for their careful reading and beneficial comments on the manuscript and address their points below. Since we added a table to the revised manuscript (Table 2), Table 2 of the old version is Table 3 in the revised version. Also, two appendix sections are added (Appendix A and Appendix B), making Appendix A of the old version Appendix C of the revised version. Some major changes have been made to the manuscript. We obtained the most recent available tide gauge records and atmospheric data. Therefore, the time series are extended to 2021 and, respectively, 2022. We checked whether using more predictive variables in our models including wind as a predictive variable improved the results. We found that adding the meridional wind to the model that only included the zonal wind improved the results. Therefore, we now include a local wind model that includes both the zonal and meridional wind. We included results on the nodal tide influence in the appendix as well as the sea-level rates for the individual tide gauge stations.

### Summary

*In this manuscript, Keizer and colleagues use a new statistical method (GAM) to infer sea-level trends and identify acceleration in the time series. Based on six tide gauges along the Dutch coast, they identify that SLR has been accelerating since 1960s, and that this acceleration is masked by wind influence on sea level. Their study highlights not only the importance of including the influence of wind and of the nodal cycle on sea level, but also show how GAM can be used to infer on the rate of sea level in other locations. This is a relevant study, that deserves to be published. I do think some things should be clarified or better presented before final publication.*

### General Comments

- *Periods used: It was unclear to me how the authors chose the periods shown in Figure 3 and Figure 4. For example, in Figure 3b, the trend until 1928 and for 1928-2020. This split doesn't coincide with the splits in Figure 4, and neither with the different periods for the two atmospheric reanalyses used. And in Figure 4, the authors give trends for 4 periods of 20 years, but it was not explained why 20 years, and why those specific divisions also. For example, why no trend over 1959 to 2000? Would be interesting to see the trend of the acceleration.*

The time periods that we use to report different trend values are indeed chosen somewhat arbitrarily. However, there are some thoughts behind our choices. The reason to obtain values for trends over certain time periods is to be able to compare those periods. Therefore, we want to split our time series into periods where the trend is rather stable. For Figure 3b, this can be achieved by splitting our time series into two parts. For Figure 4, however, the trends show more changes over time which made us pick periods of 20 years. We will add the 20 years trends over 1960–1979 and 1980–1999. We considered splitting Figure 3b in 20-year periods but considering

that two trends are plotted this would make the figure complex whereas the added informal value is little. On the other hand, using larger periods for Figure 4 would remove valuable information.

- *I think would be good to add a table to the manuscript, with the trends for the different GAM models and the different periods. Right now, the trends are given in Figure 4, and through some places in the text, but would be easier to follow in a table. And would also be good to know the trend for the entire period (1900-2019) for comparison, and a trend for before the acceleration (before 1960s) and after, not only on 20 years interval.*

We agree that adding a table, as suggested, and providing trends over the entire period for Figure 4 provides clarity. Therefore, we will implement the suggestions in the paper. We will also add the suggested trends over longer periods to this table.

## Specific Comments

- *Abstract L4: "covering the period 1890-2000". I think it was supposed to be until 2019. As it's mentioned in L11 and in the rest of the manuscript*

We should indeed adjust this, we use tide gauge records until 2021, not 2000. (1.3)

- *Figure 3: It was unclear to me if these are trends of wind, wind influence on sea level (which would be just sea-level trends), or just sea-level trends.*

These trends are wind influence on sea level, as is written in the figure's caption and in the label of the y-axis. Since we received other feedback that the terminology 'wind influence on sea level' (which is indeed sea level) is not clear enough, we have decided to add the equations describing our four GAM models to the paper (Table 1). We can refer to these equations and explain which part we are plotting. Also, we updated the titles of the panels of Figure 3 to be clearer about what is plotted.

- *L16: This line should be part of the previous paragraph (usually abstracts are a single paragraph).*

Indeed, we will adjust this. (1.15)

- *L22: sea-level rise, with hyphen (to be consistent with the fact that you always used a hyphen when sea level was mentioned (e.g., in the same line "sea-level projections"))*

Indeed, this will be adjusted.

- *L26: Should add that the contribution of Greenland is much smaller than the globally averaged contribution to the North Sea, it's not the case for most of the Southern Hemisphere (e.g., see Figure 4 of Camargo et al., 2022)*

Thank you, this is mentioned in line (1.36).

- *L50: Should change the order of the verb: "have been used as predictive variables by various authors"*

Indeed, we will adjust this.

- *L80: Would be good to refer here to Figure 1a.*

The comment will be implemented.

- *L80: I was also wondering why you didn't include Maassluis tide gauge, like in Steffelbauer et al (2022).*

We didn't include the Maassluis tide gauge as we wanted to use the same six stations as the Zeespiegelmonitor, provided by Deltares. The Zeespiegelmonitor is a report on the sea-level rise along the Dutch coast requested by the Dutch government and used for policy choices. Another reason to exclude the Maassluis station is that we want to use six stations that are spatially distributed along the Dutch coast, but the Maassluis station is very close to the Hoek v. Holland station. Furthermore, the Maassluis station is behind a sea barrier (Maeslantkering). Therefore, its sea levels are not similar to the open sea.

- *L107: (Wood, 2020) not Wood (2020)*

This is improved in the text.

- *L155: "see section 2 of Cox and Reid (2004)" should be between parathesis*

This is improved in the text.

- *Figure 2: I missed a bit more of discussion about Figure 2, there are only 4 lines about it ... Also, why was TrNcPd time series excluded from this figure? I think would be good to show the time series for the 4 GAMs, or at least explain why you decided not to show it.*

We included Figure 2 in our paper to guide the reader to our main results in Figures 3 and 4. Showing the time series that result from our GAMs helps to understand what we show in Figures 3 and 4. However, the result of TrNcZw and TrNcPd are very similar. Therefore, we don't think adding the TrNcPd time series improves the paper. We don't intend to expand our discussion of Figure 2 and add TrNcPd as we don't consider this important enough, as we'd also like to keep the paper brief.

- *L185-186: It was unclear if the authors actually tested if the increased degrees of freedom (DoF) increase the standard error of the trend enough to justify that using only one predictive variable for the wind is better than using two. Table 1 seems to suggest that the increasing the DoF is worth it, since it gives a significant decrease in the deviance. So it seems a bit contradictive then to use the increased DoF as a reason to not use more than once wind variable. I was curious if the TrNcPd model would perform better than with TrNcZw, if you had used both boxes as proxies, as suggested in Dangendorf et al (2014b), instead of taking the difference between the boxes as it was performed here.*

We tested before, using slightly different models, whether including more predictive variables for the wind improves our model results. We found that doing this decreased the deviance but did not improve the standard error of the rates. However, we checked this again using our current models and found that including the meridional wind instead of only including the zonal wind did improve the standard error. Therefore, we revised our manuscript and now include a GAM TrNcW which includes both zonal and meridional wind instead of TrNcZw which included only zonal wind. We also checked whether including two boxes of proxies (as Dangendorf et al. (2014a) did) improved the standard error compared to taking the difference between these boxes. These

two methods result in similar standard errors. Therefore, we choose to use the method where we take the difference as the model is simpler and the difference between the boxes represents the zonal wind by geostrophy. We thank the author for this useful comment as it helped us improve the manuscript a lot.

- *L195-196: Why are your results in contraction with the ones of Dangendorf et al (2014a) Do you mean that they get a negative trend while you have a positive one in Figure 3b? Are you then comparing your trends from 1836-1928 and 1929-2020 with the ones from 1953-2003 and 1900-2011 from Dangendorf et. al (2014a)? If that is the case, it's not very consistent to compare trends of such different periods. Then the difference in the results would not be only the results of an update in the atmospheric reanalysis, but also from the fact that you are comparing different periods.*

Indeed, for Figure 3b we find a positive trend due to atmospheric drivers over the whole period. Dangendorf finds a positive trend for the period 1953–2003 (Figure 2c of Dangendorf et al. (2014b)) but a negative trend over the period 1900–2011 (Figure 12 of Dangendorf et al. (2014b)). We will improve our writing such that our message becomes clearer. Whereas we do compare different periods, Figure 3b shows the evolution of the trend over time, an increase in the wind influence on sea level over the full period. We would thus find a positive trend over any period, whereas Dangendorf et al. (2014b) finds a negative trend in Figure 12. We will add the time averages of our results over the same periods to the text.

- *Section 4.3: Was a bit confusing how you start with Figure 4, discusses Table 2, and then moves back to Figure 4. I would suggest have it clearly separated, to be less confusing for the reader (and maybe moving the paragraph starting in L231 to before L215, to introduce the acceleration in the 1960s).*

Thanks for the comment. We agree that switching between the figure and tables can be confusing. However, the section does make sense in terms of the storyline. We decide to prioritize the storyline here.

- *L210-212: Would it be possible to give a number when you talk about lower/higher uncertainties here? Maybe the average width of the confidence interval for the time series?*

Indeed, we will improve our text by discussing the time average of the standard error for the different models.

- *L212: Refer here to Figure 4f.*

The comment will be implemented.

- *L222-227: You talk here in percentages, and table 2 is in probability. Just a suggestion, but maybe you should have Table 2 in % as well, to be consistent.*

Thanks for the suggestion. We will, however, keep the probabilities in the table and percentages in the text. Our reasons are that it is common practice to show probabilities. However, in the text, we use percentages to explain the meaning of the numbers to people who are not used to p-values.

- *L228-230: This is a very important conclusion of your results. You should emphasize this in the conclusion (sorry if you have done it and I missed it).*

This is emphasized in the last paragraph of the conclusions.

- *L231: typo: 1960*”.

Thanks, it will be changed.

- *Figure 3 caption: would be good to add to the caption the line colors as well: ”(TrNcZw, orange line) ... (TrNcPd, blue line)”*. Also, when referring to Figure 1, should be Figure 1b.

Thanks, it will be changed.

- *Table 2 caption: I guess this is more of a style choice, but I would say that the explanation that starts with the ”For example, ...” should be in the main text, and not in the caption of the table.*

We noticed that this table could be wrongly interpreted by people who are not used to p-values. This is why we prefer to keep this additional text here to also make it clear to people who will not read the text thoroughly.

- *L241: ”Calafat and Chambers (2013) and Steffelbauer et al (2022).*

Thanks, it will be changed.

- *L246: ”results in Calafat and Chambers (2013) and Steffelbauer et al (2022).” not between parenthesis*

Thanks, it will be changed.

- *L259-262 This is a very long sentence (4 sentences) ... Also, 1 paragraph sentences should be avoided.*

We will rewrite this sentence for clarity. However, the discussion is structured to start a new paragraph for a new subject which makes this a rather small paragraph.

- *L267: Maybe also good to refer to the work from Dangendorf et al (2021) here?*

Thank you for this suggestion, we will include the reference.

- *L275: Is the 1.5 the rate of the acceleration period (1975-2000)? That is not shown in Figure 4c. Here also would benefit from having a table with the trends for the different periods (as suggesting in General Comment 2). Also the reason why you divided by 25 (I assume is the number of years from 1975-2000) was not super clear, it would be good to have this better explained, as this is a very important application of the results.*

We will explain how we obtain the rate of 1.5 and why we divide by 25 years. We obtain the acceleration by obtaining the difference in rate (1.5) over a period of 25 years and divide by the period (25).

- *L285-286: This sentence implies that you did test the model using more than one predictive variable for the wind (which was unclear before). If you did test it, I would suggest having these results in the supplementary information, so that the reader can actually see it.*

Good suggestion. The comparison of the different methods is now discussed in the first section

"Comparison of Different GAMs" of the "Results" section.
